# Supplementary material for: Peripheral blood mononuclear cells from neovascular age-related macular degeneration patients produce higher levels of chemokines CCL2 (MCP-1) and CXCL8 (IL-8)
Source: Springer Nature journal article supplement (doi:10.1186/s12974-017-0820-y), 2017-02-23
Supplement: MOESM1 [file 12089860]

**Table S1:** Demographic and clinical characteristics of nAMD patients and controls from serum

study (study 1)

|                                                     | All<br>(n = 176) | Controls<br>(n = 43) | nAMD<br>(n = 133) | <b>P value<br/>nAMD vs<br/>Control</b> |
|-----------------------------------------------------|------------------|----------------------|-------------------|----------------------------------------|
| Age (median (range)), years                         | 79.6 (53-93)     | 74.0 (58-92)         | 80.4 (53-93)      | <b>0.001</b> <sup>1</sup>              |
| Female sex (number (%))                             | 86 (49)          | 19 (44)              | 67 (50)           | 0.480 <sup>2</sup>                     |
| Have history of AMD (number (%))                    | 39 (22)          | 6 (14)               | 33 (25)           | 0.153 <sup>2</sup>                     |
| Have history of cardiovascular disease (number (%)) | 48 (27)          | 9 (21)               | 39 (29)           | 0.317 <sup>2</sup>                     |
| Have history of hypertension (number (%))           | 106 (60)         | 23 (53)              | 83 (62)           | 0.377 <sup>2</sup>                     |
| Have history of diabetes (number (%))               | 21 (12)          | 2 (5)                | 19 (14)           | 0.098 <sup>2</sup>                     |
| Body Mass Index (mean ± SD)                         | 26.0 (4.6)       | 26.1 (5.1)           | 26.0 (4.4)        | 0.912 <sup>3</sup>                     |
| Smoking status                                      |                  |                      |                   | 0.731 <sup>2</sup>                     |
| Non-smoker (number (%))                             | 76 (43)          | 20 (47)              | 56 (42)           |                                        |
| Former smoker (number (%))                          | 87 (50)          | 20 (47)              | 67 (50)           |                                        |
| Current smoker (number (%))                         | 12 (7)           | 2 (5)                | 10 (8)            |                                        |
| Taking cardiovascular medication (number (%))       | 129 (73)         | 28 (65)              | 101 (76)          | 0.234 <sup>2</sup>                     |
| Taking vitamins (number (%))                        | 39 (22)          | 3 (7)                | 36 (27)           | <b>0.007</b> <sup>2</sup>              |
| Taking low-dose aspirin (number (%))                | 57 (32)          | 5 (12)               | 52 (39)           | <b>0.001</b> <sup>2</sup>              |

<sup>1</sup> Mann Whitney U test<sup>2</sup> Pearson's chi-square test<sup>3</sup> Independent samples t-testSD: Standard deviation; **Bold**  $P < 0.05$
