# Supplementary material for: Peripheral blood mononuclear cells from neovascular age-related macular degeneration patients produce higher levels of chemokines CCL2 (MCP-1) and CXCL8 (IL-8)
Source: Springer Nature journal article supplement (doi:10.1186/s12974-017-0820-y), 2017-02-23
Supplement: MOESM2 [file 12089860]

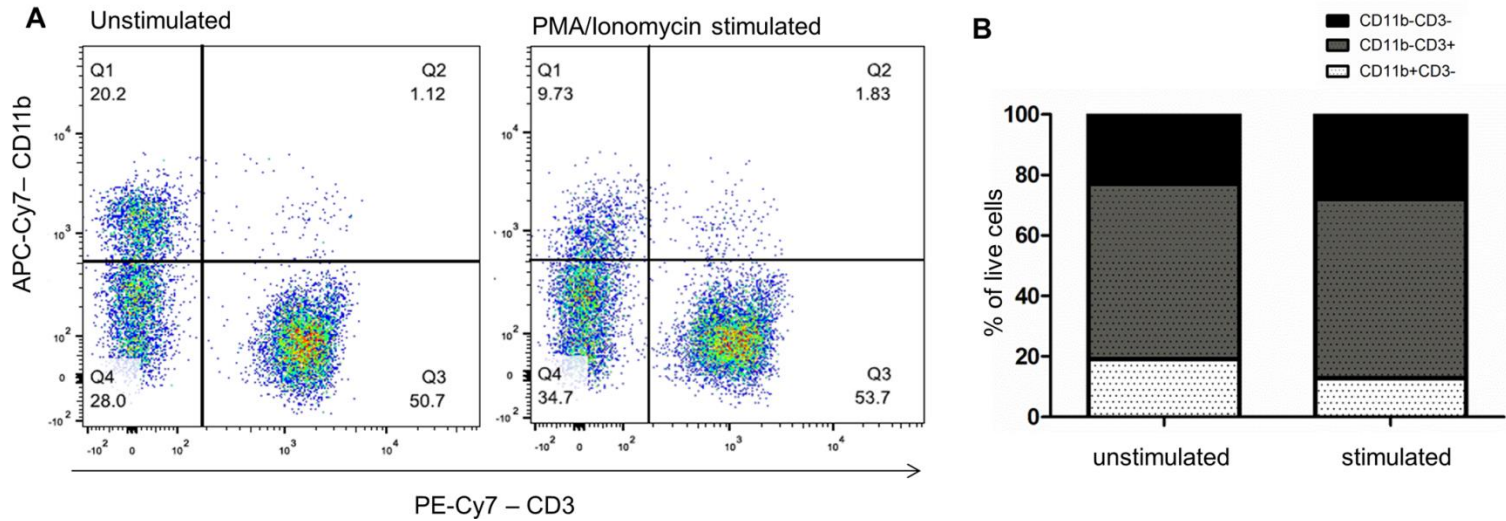

**Figure S1: Flow cytometry analysis of PBMCs.** PBMCs were first divided into CD11b<sup>+</sup>CD3<sup>-</sup>, CD11b<sup>-</sup>CD3<sup>+</sup> and CD11b<sup>-</sup>CD3<sup>-</sup> cells (A) and the average percentage of all samples (n = 55) was analysed before and after stimulation with PMA/ionomycin (B).

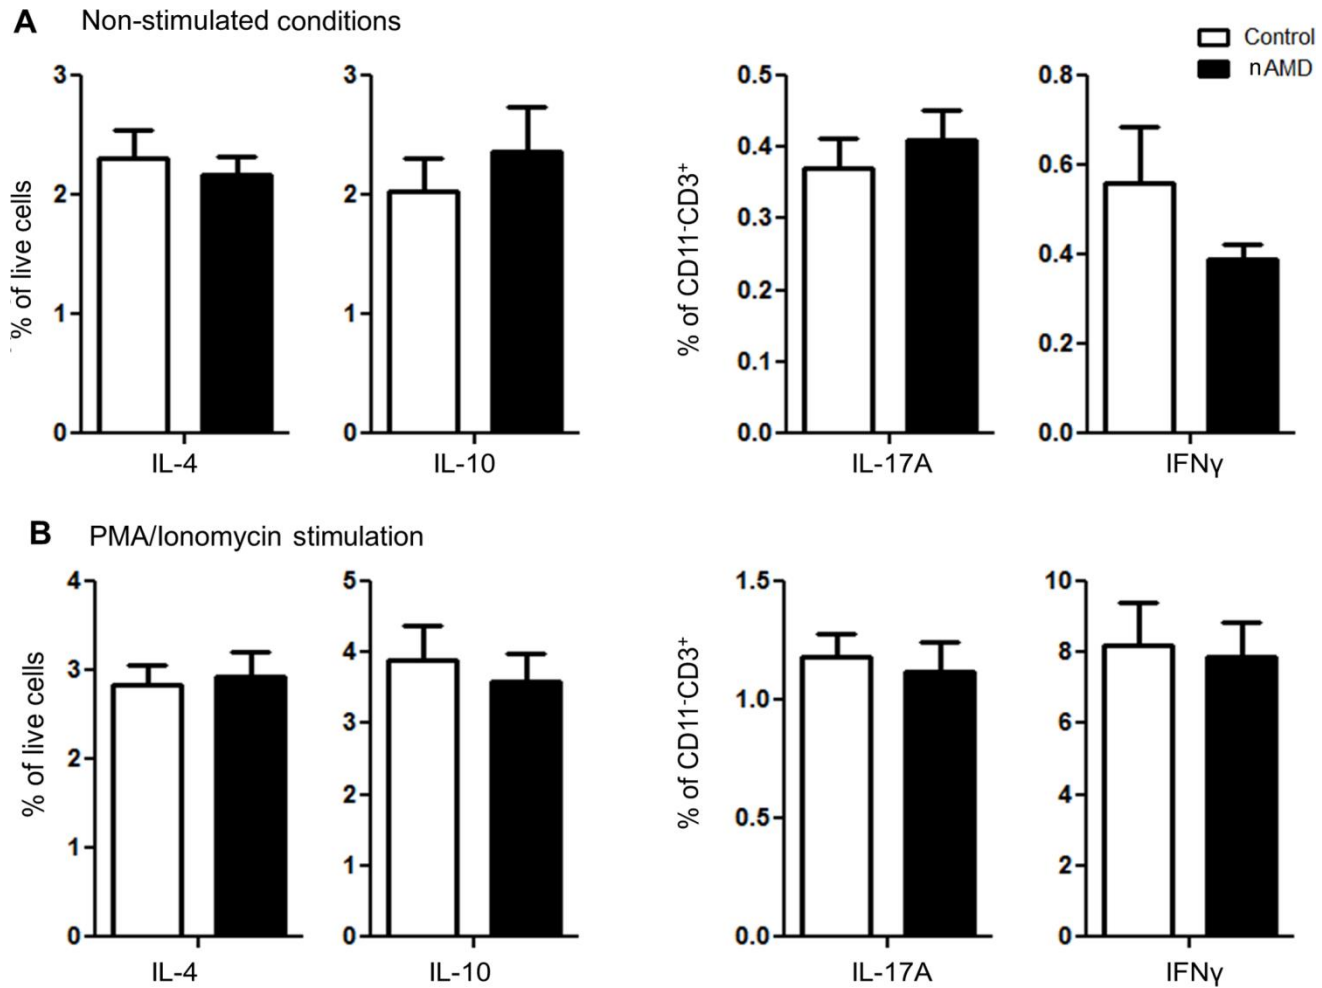

**Figure S2:** Percentage of total IL-4 and IL-10 producing PBMCs and percentage of CD11b<sup>-</sup>CD3<sup>+</sup> IL-17A and IFN $\gamma$  producing PBMCs (almost all of IL-17A and IFN $\gamma$  producing PBMCs were CD11b<sup>-</sup>CD3<sup>+</sup>) from controls and nAMD patients under non-stimulated culture conditions and after stimulation with PMA/ionomycin. Controls n = 27, nAMD = 28; mean + SEM are shown.
